# Supplementary material for: Temporal profiling of primary metabolites under chilling stress and its association with seedling chilling tolerance of rice (Oryza sativa L.)
Source: PubMed Central journal article supplement (PMC4883686; doi:10.1186/1939-8433-6-23), 2013-10-05
Supplement: 12284_2013_59_MOESM7_ESM.pdf [file 12284_2013_59_MOESM7_ESM.pdf]

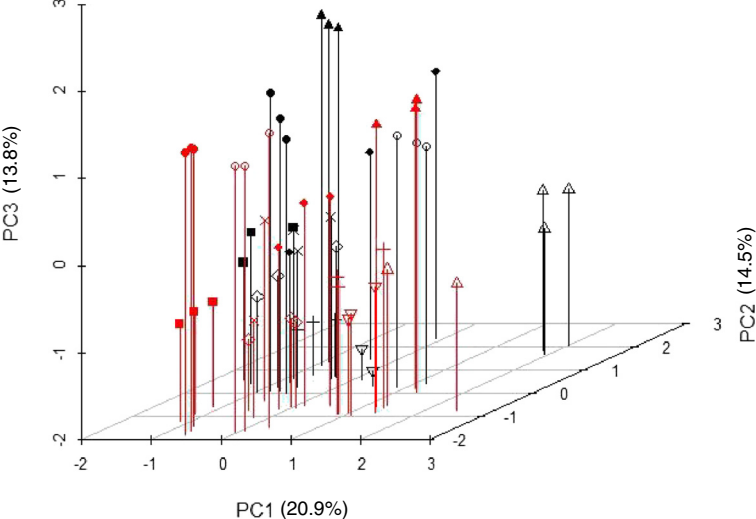

○ △ ▽ ◇ + : Metabolite data from leaves sampled at 2, 8, 24, 48 h and R-24 h under the non-stress control

● ▲ ◆ ■ X : Metabolite data from leaves sampled at 2, 8, 24, 48 h of the 4°C stress and R-24 h
