# Supplementary material for: Temporal profiling of primary metabolites under chilling stress and its association with seedling chilling tolerance of rice (Oryza sativa L.)
Source: PubMed Central journal article supplement (PMC4883686; doi:10.1186/1939-8433-6-23), 2013-10-05

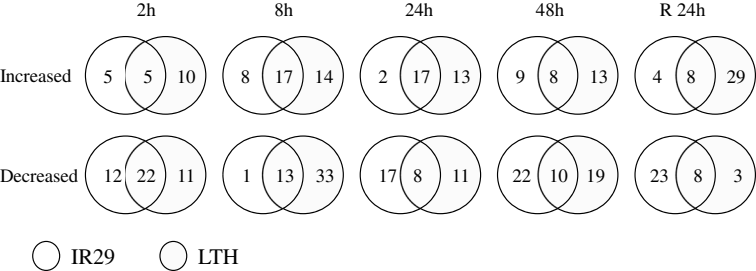

Supplement: 12284_2013_59_MOESM8_ESM.pdf [file 12284_2013_59_MOESM8_ESM.pdf]
